# Supplementary material for: Enhanced Sulfur Transformation by Multifunctional FeS2/FeS/S Composites for High‐Volumetric Capacity Cathodes in Lithium–Sulfur Batteries
Source: PubMed Central journal article supplement (PMC6425436; doi:10.1002/advs.201800815), 2019-02-10
Supplement: ADVS-6-1800815-s001.pdf [file ADVS-6-1800815-s001.pdf]

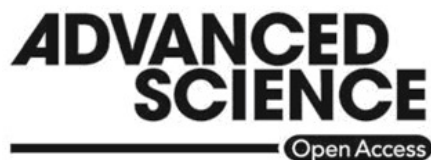

## Supporting Information

for *Adv. Sci.*, DOI: 10.1002/adv.201800815

Enhanced Sulfur Transformation by Multifunctional FeS<sub>2</sub>/FeS/S Composites for High-Volumetric Capacity Cathodes in Lithium–Sulfur Batteries

*Kai Xi, Deqing He, Chris Harris, Yuankun Wang, Chao Lai,\* Huanglong Li,\* Paul R. Coxon, Shujiang Ding, Chao Wang,\* and Ramachandran Vasant Kumar*

## Supporting Information

**Enhanced Sulfur Transformation by Multifunctional FeS<sub>2</sub>/FeS/S Composites for High-Volumetric Capacity Cathodes in Lithium-Sulfur Batteries**

Kai Xi,<sup>‡</sup> Deqing He,<sup>‡</sup> Chris Harris, Yuankun Wang, Chao Lai,<sup>\*</sup> Huanglong Li,<sup>\*</sup> Paul R. Coxon, Shujiang Ding, Chao Wang,<sup>\*</sup> R. Vasant Kumar

Dr. K. Xi, Dr. C. Harris, Dr. P.R. Coxon, Prof. R.V. Kumar  
Department of Materials Science and Metallurgy, University of Cambridge, Cambridge CB3 0FS, United Kingdom

Dr. D. He, Prof. C. Lai, Prof. C. Wang  
School of Chemistry and Materials Chemistry, Jiangsu Normal University, Xuzhou, Jiangsu 221116, PR China.

E-mail: laichao@jsnu.edu.cn; wangc@jsnu.edu.cn

Dr. Y. Wang, Prof. S. Ding  
Department of Applied Chemistry, School of Science, MOE Key Laboratory for Nonequilibrium Synthesis and Modulation of Condensed Matter, State Key Laboratory for Mechanical Behavior of Materials, State Key Laboratory of Electrical Insulation and Power Equipment, Xi'an Jiaotong University, Xi'an 710049, People's Republic of China.

Dr. H. Li  
Department of Precision Instrument, Tsinghua University, Beijing, China  
E-mail: li\_huanglong@tsinghua.edu.cn

**Keywords:** Lithium-sulfur batteries; FeS<sub>2</sub>/FeS/S composites; Volumetric energy density; DFT calculations; Catalytic effect.

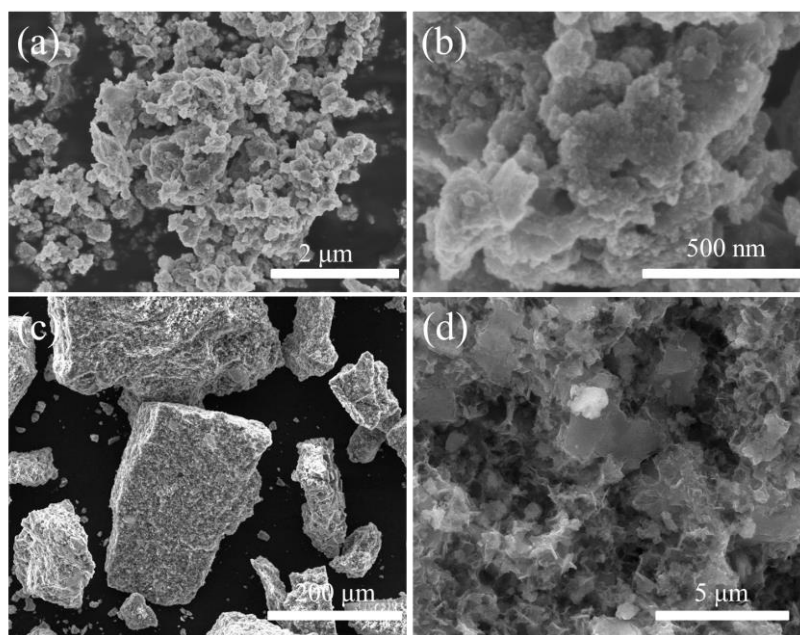

**Figure S1.** (a,b) SEM images of FeS<sub>2</sub>/FeS/S composites after washing with trichloromethane (0.1g composite in 100 mL solvent); (c,d) SEM images of the ball-milled sample without washing.

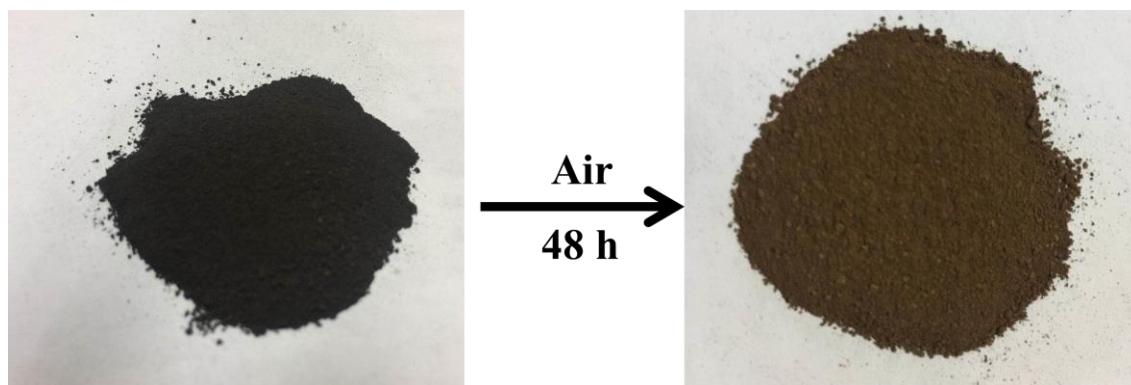

**Figure S2.** Colour comparisons of FeS<sub>2</sub>/FeS/S composites before and after air exposure for 48 h.

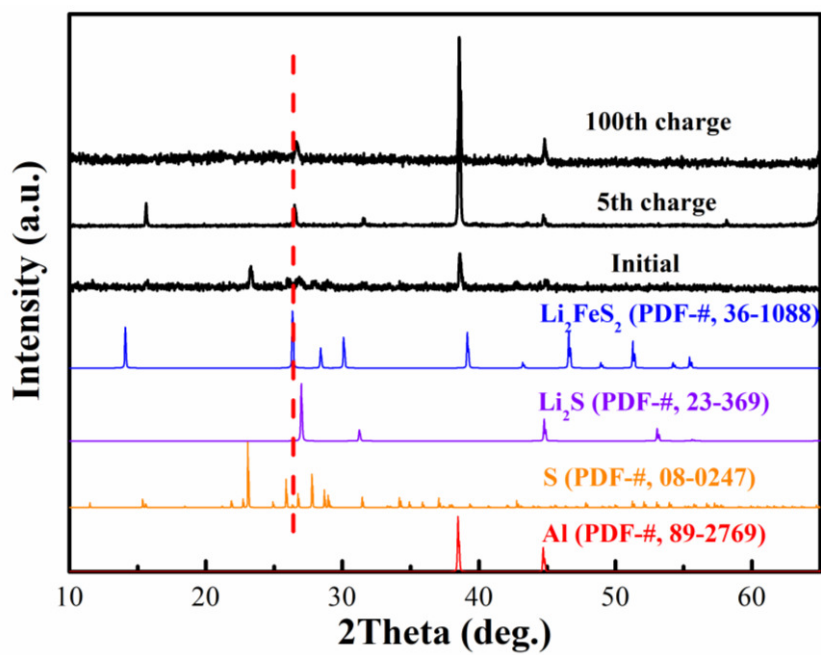

**Figure S3.** XRD spectra of FeS<sub>2</sub>/FeS/S composites electrodes after various cycling times.

**Table S1.** Comparisons of the volumetric capacity of FeS<sub>2</sub>/FeS/S composites and reported sulfur-based cathodes.

| Materials               | Volumetric capacity<br>(Ah·L <sup>-1</sup> )                                          | Ref                                                                  |
|-------------------------|---------------------------------------------------------------------------------------|----------------------------------------------------------------------|
| FeS <sub>2</sub> /FeS/S | 1491.7 (30cycle, 0.1C)<br>746.9 (200cycle, 1.0C)<br>based on electrode                | <b>This work</b>                                                     |
| rGO-VS <sub>2</sub> /S  | 1182.1 (100cycle, 0.1C)<br>based on electrode                                         | Advanced Energy Materials, 2017: 1702337                             |
| Aligned CNT/S           | 1116 (5cycle, 0.1C)<br>based on electrode                                             | Nano Energy, 2014, 4(2): 65-72                                       |
| MNCS/CNT-S              | 1140 (200cycle, 1.68<br>mA·cm <sup>-2</sup> )<br>based on sulfur(56% in<br>electrode) | Angewandte Chemie, 2015, 54(14): 4325-4329                           |
| PSC-CNT-S               | 800 (80cycle, 0.84mA·cm <sup>-2</sup> )<br>based on sulfur                            | Acs Applied Materials & Interfaces, 2013, 5(21):<br>11355-11362      |
| ρPAN-KB/S               | 576 (100cycle, 0.5C)<br>based on sulfur                                               | Journal of Power Sources, 2016, 302: 70–78                           |
| Nafion-coated<br>FGSS   | 870 (1cycle, 0.1C)<br>based on electrode                                              | Physical Chemistry Chemical Physics Pccp, 2011,<br>13(17): 7660-7665 |
| GGs                     | Below 450 (50cycle, 0.1C)<br>based on electrode                                       | Rsc Advances, 2015, 5(59): 47621-47627                               |

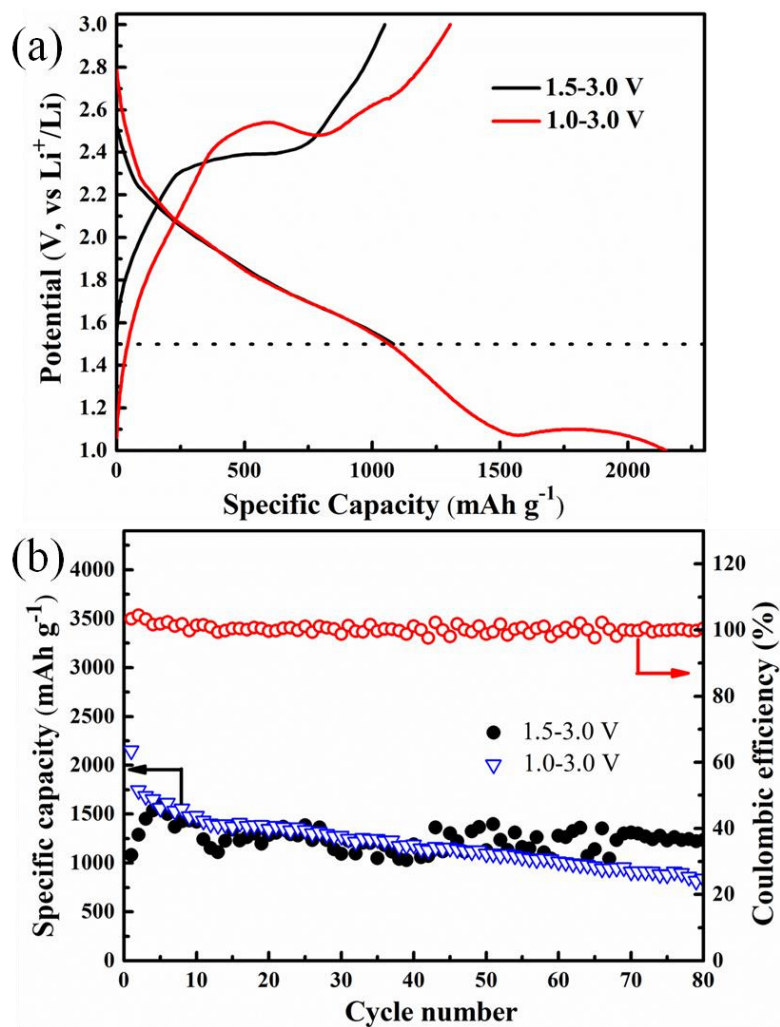

**Figure S4.** Discharge-charge curves (a) and cycle performance of FeS<sub>2</sub>/FeS/S composites at a current density of 300 mA g<sup>-1</sup> at various cut-off potentials.

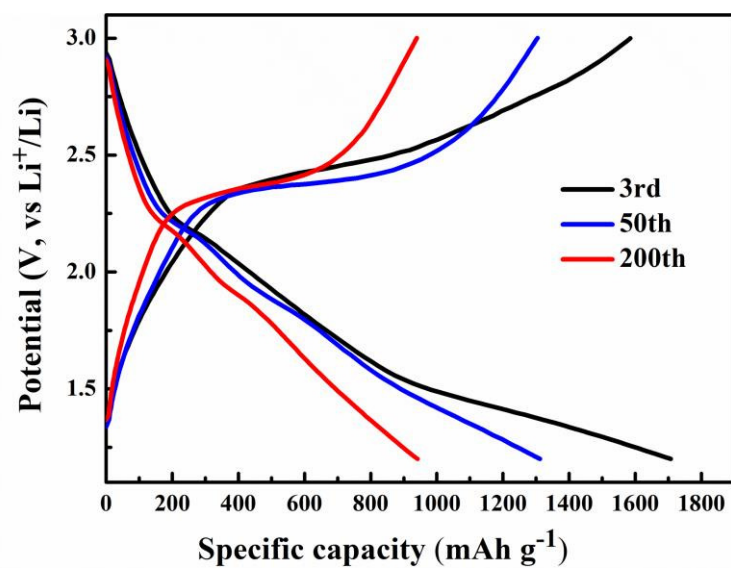

**Figure S5.** Discharge-charge curves of FeS<sub>2</sub>/FeS/S composites at a current density of 1600 mA g<sup>-1</sup>.

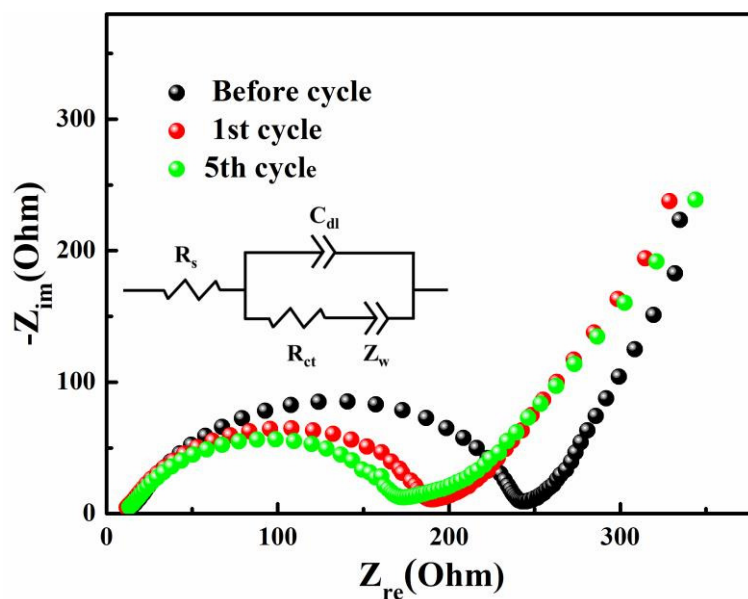

**Figure S6.** Electrochemical impedance spectroscopy of FeS<sub>2</sub>/FeS/S composites.

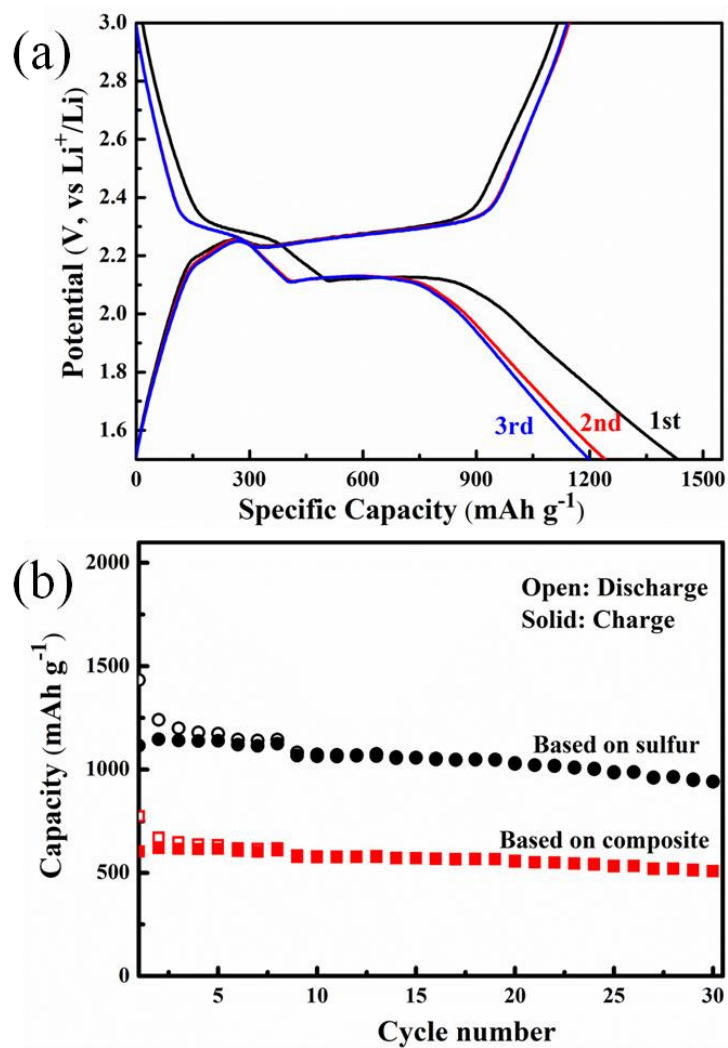

**Figure S7.** Discharge-charge curves (a) and cycle performance of conventional S/CNT composites at a current density of 160 mA g<sup>-1</sup>.

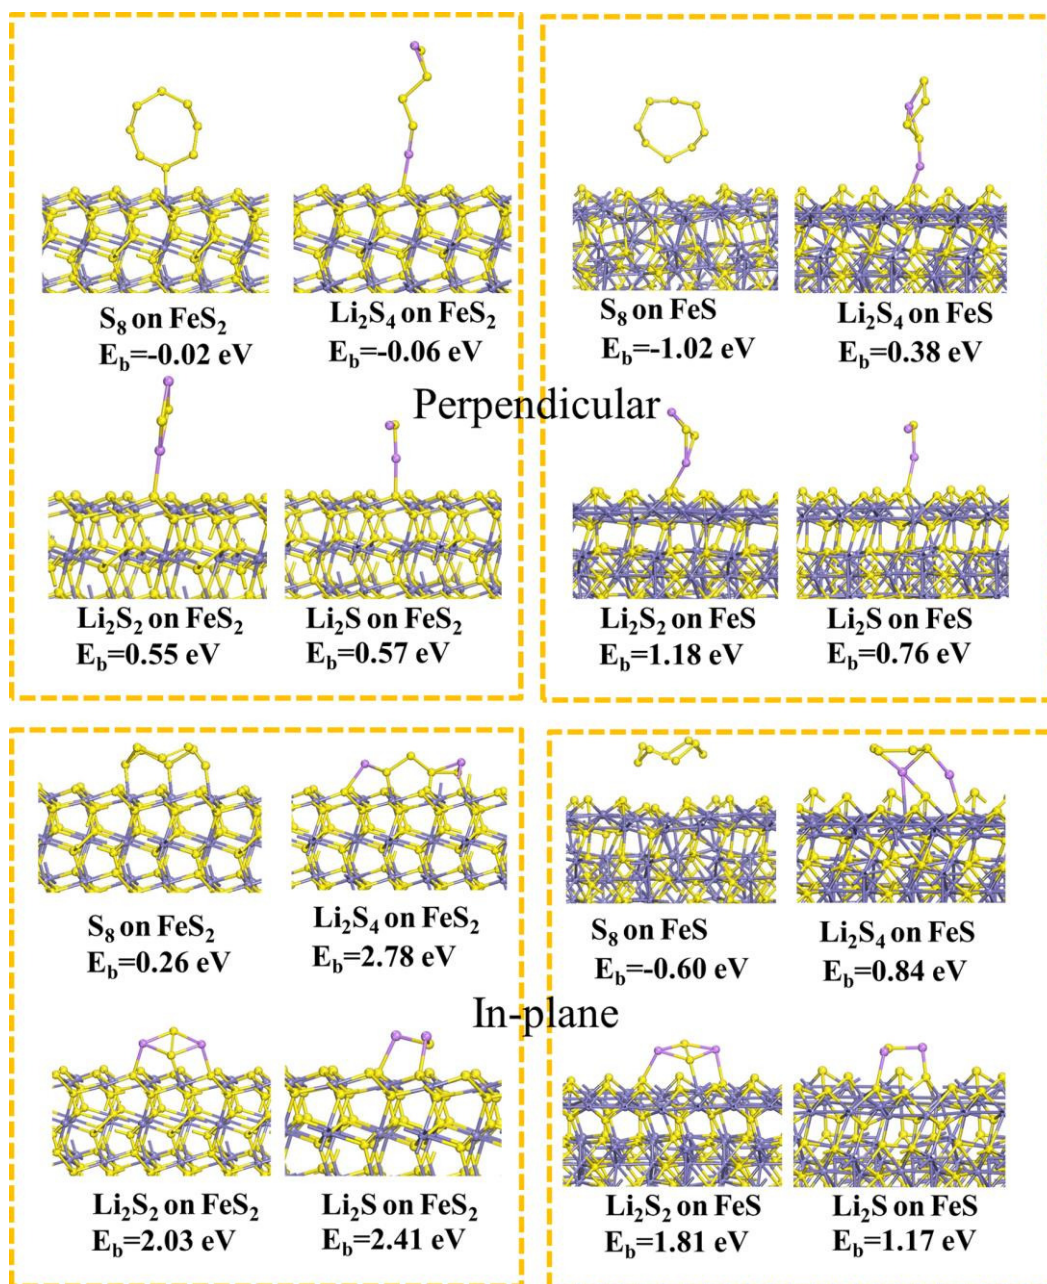

**Figure S8.** Optimized geometries of  $S_8$ ,  $Li_2S_4$ ,  $Li_2S_2$  and  $Li_2S$  on  $FeS_2$  and  $FeS$  surfaces.



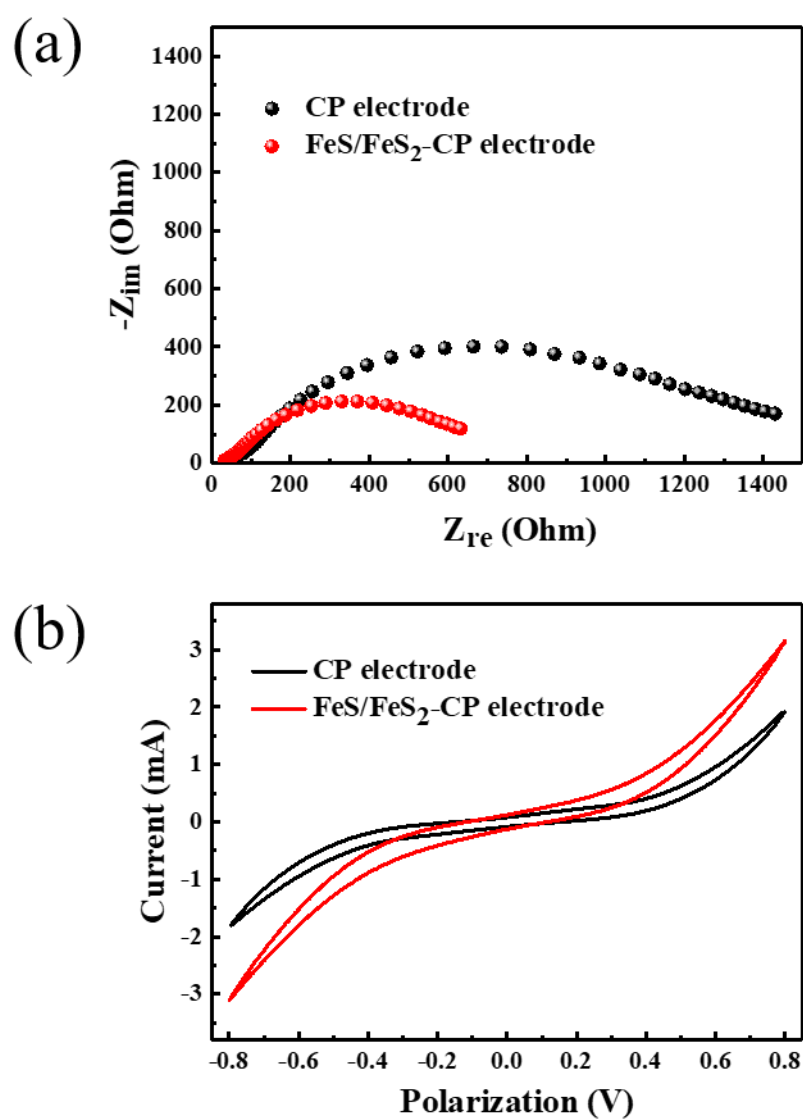

**Figure S9.** Electrochemical impedance spectroscopy (a) and CVs (b) of CP electrode with or without FeS/FeS<sub>2</sub>.
